CORRECTION

# Correction: MEIS-WNT5A axis regulates development of fourth ventricle choroid plexus

**Karol Kaiser<sup>1</sup>, Ahram Jang<sup>2</sup>, Petra Kompanikova<sup>1</sup>, Melody P. Lun<sup>2</sup>, Jan Prochazka<sup>3</sup>, Ondrej Machon<sup>4</sup>, Neil Dani<sup>2</sup>, Michaela Prochazkova<sup>3</sup>, Benoit Laurent<sup>5,6</sup>, Daniel Gyllborg<sup>7</sup>, Renee van Amerongen<sup>8</sup>, Ryann M. Fame<sup>2</sup>, Suhasini Gupta<sup>2</sup>, Feizhen Wu<sup>9</sup>, Roger A. Barker<sup>10</sup>, Ivana Bukova<sup>3</sup>, Radislav Sedlacek<sup>3</sup>, Zbynek Kozmik<sup>11</sup>, Ernest Arenas<sup>12</sup>, Maria K. Lehtinen<sup>2</sup> and Vitezslav Bryja<sup>1</sup>**

<sup>1</sup>Department of Experimental Biology, Faculty of Science, Masaryk University, Brno 61137, Czech Republic. <sup>2</sup>Department of Pathology, Boston Children's Hospital, Boston, MA 02115, USA. <sup>3</sup>Czech Centre for Phenogenomics and Laboratory of Transgenic Models of Diseases, Institute of Molecular Genetics of the CAS, Prague 142 20, Czech Republic. <sup>4</sup>Department of Developmental Biology, Institute of Experimental Medicine, Academy of Sciences of the Czech Republic, 142 20 Prague, Czech Republic. <sup>5</sup>Research Center on Aging, CIUSSS de l'Estrie – CHUS, Sherbrooke, QC 75361, Canada. <sup>6</sup>Department of Biochemistry and Functional Genomics, Faculty of Medicine and Health Sciences, Université de Sherbrooke, Sherbrooke, QC 75281, Canada. <sup>7</sup>Science for Life Laboratory, Department of Biochemistry and Biophysics, Stockholm University, Solna SE-106 91, Sweden. <sup>8</sup>Swammerdam Institute for Life Sciences, Section of Molecular Cytology, Faculty of Science, University of Amsterdam 1098 XH, Netherlands. <sup>9</sup>Shanghai Institute of Cardiovascular Diseases, Zhongshan Hospital, Institutes of Biomedical Sciences, Fudan University, Shanghai 200032, China. <sup>10</sup>John van Geest Centre for Brain Repair and WT-MRC Cambridge Stem Cell Centre, University of Cambridge, Cambridge CB2 0PY, UK. <sup>11</sup>Laboratory of Transcriptional Regulation, Institute of Molecular Genetics of the CAS, Prague 142 20, Czech Republic. <sup>12</sup>Department of Medical Biochemistry and Biophysics, Karolinska Institutet, Stockholm 171 77, Sweden.

There was an error in Development (2021) 148, dev192054 (doi:10.1242/dev.192054).

In the author affiliations, affiliation 4 was incorrect.

**Corrected:**

**Karol Kaiser<sup>1</sup>, Ahram Jang<sup>2</sup>, Petra Kompanikova<sup>1</sup>, Melody P. Lun<sup>2</sup>, Jan Prochazka<sup>3</sup>, Ondrej Machon<sup>4</sup>, Neil Dani<sup>2</sup>, Michaela Prochazkova<sup>3</sup>, Benoit Laurent<sup>5,6</sup>, Daniel Gyllborg<sup>7</sup>, Renee van Amerongen<sup>8</sup>, Ryann M. Fame<sup>2</sup>, Suhasini Gupta<sup>2</sup>, Feizhen Wu<sup>9</sup>, Roger A. Barker<sup>10</sup>, Ivana Bukova<sup>3</sup>, Radislav Sedlacek<sup>3</sup>, Zbynek Kozmik<sup>11</sup>, Ernest Arenas<sup>12</sup>, Maria K. Lehtinen<sup>2</sup> and Vitezslav Bryja<sup>1</sup>**

<sup>1</sup>Department of Experimental Biology, Faculty of Science, Masaryk University, Brno 61137, Czech Republic. <sup>2</sup>Department of Pathology, Boston Children's Hospital, Boston, MA 02115, USA. <sup>3</sup>Czech Centre for Phenogenomics and Laboratory of Transgenic Models of Diseases, Institute of Molecular Genetics of the CAS, Prague 142 20, Czech Republic. <sup>4</sup>Department of Developmental Biology, Institute of Experimental Medicine, Academy of Sciences of the Czech Republic, 142 20 Prague, Czech Republic. <sup>5</sup>Research Center on Aging, CIUSSS de l'Estrie - CHUS, Sherbrooke, QC 75361, Canada. <sup>6</sup>Department of Biochemistry and Functional Genomics, Faculty of Medicine and Health Sciences, Université de Sherbrooke, Sherbrooke, QC 75281, Canada. <sup>7</sup>Science for Life Laboratory, Department of Biochemistry and Biophysics, Stockholm University, Solna SE-106 91, Sweden. <sup>8</sup>Swammerdam Institute for Life Sciences, Section of Molecular Cytology, Faculty of Science, University of Amsterdam 1098 XH, Netherlands. <sup>9</sup>Shanghai Institute of Cardiovascular Diseases, Zhongshan Hospital, Institutes of Biomedical Sciences, Fudan University, Shanghai 200032, China. <sup>10</sup>John van Geest Centre for Brain Repair and WT-MRC Cambridge Stem Cell Centre, University of Cambridge, Cambridge CB2 0PY, UK. <sup>11</sup>Laboratory of Transcriptional Regulation, Institute of Molecular Genetics of the CAS, Prague 142 20, Czech Republic. <sup>12</sup>Department of Medical Biochemistry and Biophysics, Karolinska Institutet, Stockholm 171 77, Sweden.

**Original:**

**Karol Kaiser<sup>1</sup>, Ahram Jang<sup>2</sup>, Petra Kompanikova<sup>1</sup>, Melody P. Lun<sup>2</sup>, Jan Prochazka<sup>3</sup>, Ondrej Machon<sup>4</sup>, Neil Dani<sup>2</sup>, Michaela Prochazkova<sup>3</sup>, Benoit Laurent<sup>5,6</sup>, Daniel Gyllborg<sup>7</sup>, Renee van Amerongen<sup>8</sup>, Ryann M. Fame<sup>2</sup>, Suhasini Gupta<sup>2</sup>, Feizhen Wu<sup>9</sup>, Roger A. Barker<sup>10</sup>, Ivana Bukova<sup>3</sup>, Radislav Sedlacek<sup>3</sup>, Zbynek Kozmik<sup>4</sup>, Ernest Arenas<sup>11</sup>, Maria K. Lehtinen<sup>2</sup> and Vitezslav Bryja<sup>1</sup>**

<sup>1</sup>Department of Experimental Biology, Faculty of Science, Masaryk University, Brno 61137, Czech Republic. <sup>2</sup>Department of Pathology, Boston Children's Hospital, Boston, MA 02115, USA. <sup>3</sup>Czech Centre for Phenogenomics and Laboratory of Transgenic Models of Diseases, Institute of Molecular Genetics of the CAS, Prague 142 20, Czech Republic. <sup>4</sup>Laboratory of Transcriptional Regulation, Institute of Molecular Genetics of the CAS, Prague 142 20, Czech Republic. <sup>5</sup>Research Center on Aging, CIUSSS de l'Estrie - CHUS, Sherbrooke, QC 75361, Canada. <sup>6</sup>Department of Biochemistry and Functional Genomics, Faculty of Medicine and Health Sciences, Université de Sherbrooke, Sherbrooke, QC 75281, Canada. <sup>7</sup>Science for Life Laboratory, Department of Biochemistry and Biophysics, Stockholm University, Solna SE-106 91, Sweden. <sup>8</sup>Swammerdam Institute for Life Sciences, Section of Molecular Cytology, Faculty of Science, University of Amsterdam 1098 XH, Netherlands. <sup>9</sup>Shanghai Institute of Cardiovascular Diseases, Zhongshan Hospital, Institutes of Biomedical Sciences, Fudan University, Shanghai 200032, China. <sup>10</sup>John van Geest Centre for Brain Repair and WT-MRC Cambridge Stem Cell Centre, University of Cambridge, Cambridge CB2 0PY, UK. <sup>11</sup>Department of Medical Biochemistry and Biophysics, Karolinska Institutet, Stockholm 171 77, Sweden.

Both the online full-text and PDF versions have been updated.

The authors apologise to readers for this error and any inconvenience this may have caused.
